# Supplementary material for: Status and potential of bacterial genomics for public health practice: a scoping review
Source: PubMed Central journal article supplement (PMC6692930; doi:10.1186/s13012-019-0930-2), 2019-08-13
Supplement: 13012_2019_930_MOESM6_ESM.pdf [file 13012_2019_930_MOESM6_ESM.pdf]

| Characteristic                                     | Categories                                                                                                                                                                                     | Remarks/explanation                                                                                                                                                                                                                                                               |
|----------------------------------------------------|------------------------------------------------------------------------------------------------------------------------------------------------------------------------------------------------|-----------------------------------------------------------------------------------------------------------------------------------------------------------------------------------------------------------------------------------------------------------------------------------|
| <b>Title</b>                                       |                                                                                                                                                                                                |                                                                                                                                                                                                                                                                                   |
| <b>Author</b>                                      |                                                                                                                                                                                                |                                                                                                                                                                                                                                                                                   |
| <b>Year of publication</b>                         |                                                                                                                                                                                                |                                                                                                                                                                                                                                                                                   |
| <b>Pathogen</b>                                    |                                                                                                                                                                                                |                                                                                                                                                                                                                                                                                   |
| <b>Country</b>                                     |                                                                                                                                                                                                | Country of residence of the patients infected with the bacteria                                                                                                                                                                                                                   |
| <b>Setting</b>                                     | Community, hospital, nursing home, school, etc.                                                                                                                                                | Community vs. Institutional                                                                                                                                                                                                                                                       |
| <b>Material sequenced (sample size)</b>            | Clinical isolates                                                                                                                                                                              |                                                                                                                                                                                                                                                                                   |
|                                                    | Food isolates                                                                                                                                                                                  |                                                                                                                                                                                                                                                                                   |
|                                                    | Animal isolates                                                                                                                                                                                |                                                                                                                                                                                                                                                                                   |
|                                                    | Environmental isolates                                                                                                                                                                         |                                                                                                                                                                                                                                                                                   |
| <b>Sampling fraction of the NGS analyses</b>       | All available samples                                                                                                                                                                          | Which proportion (all or subset) of the samples that were collected/available for this particular study (surveillance/outbreak investigation) were sequenced?                                                                                                                     |
|                                                    | Subset of available samples (complementary)                                                                                                                                                    |                                                                                                                                                                                                                                                                                   |
| <b>Public health objective</b>                     | Outbreak investigation                                                                                                                                                                         | As a reaction to a sudden increase in the number of cases or to an unusual event. The main objective is to investigate the possible source(s) of infection and/or routes of transmission, and to implement effective and appropriate control measures to stop its further spread. |
|                                                    | Control-oriented surveillance                                                                                                                                                                  | The purpose is to identify each occurrence of a particular disease, hazard, or other health-related event that requires a specific response, and to support the delivery of an effective intervention.                                                                            |
|                                                    | Strategy-oriented surveillance                                                                                                                                                                 | The aim is to monitor long-term changes in epidemiology over larger geographic and population scales and to provide information to support prevention strategies to reduce population risk.                                                                                       |
| <b>Study aim(s)</b>                                | Source tracing                                                                                                                                                                                 |                                                                                                                                                                                                                                                                                   |
|                                                    | Contact tracing                                                                                                                                                                                |                                                                                                                                                                                                                                                                                   |
|                                                    | Understand transmission dynamics (identify transmission networks/clusters)                                                                                                                     |                                                                                                                                                                                                                                                                                   |
|                                                    | Inform outbreak management: feedback on key phenotypic attributes                                                                                                                              |                                                                                                                                                                                                                                                                                   |
|                                                    | Early outbreak detection                                                                                                                                                                       |                                                                                                                                                                                                                                                                                   |
|                                                    | Overview of circulating strains to identify the emergence of new threats: detection of novel strains/antimicrobial resistance/cross-border epidemic strains/zoonotic events/enhanced virulence |                                                                                                                                                                                                                                                                                   |
|                                                    | Impact assessment of prevention and control programs: vaccination/antibiotic stewardship                                                                                                       |                                                                                                                                                                                                                                                                                   |
| Identification of risk factors and risk groups     |                                                                                                                                                                                                |                                                                                                                                                                                                                                                                                   |
| <b>Time orientation of NGS analyses</b>            | Retrospective                                                                                                                                                                                  |                                                                                                                                                                                                                                                                                   |
|                                                    | 'Near' real-time (within the time period of the outbreak investigation)                                                                                                                        |                                                                                                                                                                                                                                                                                   |
|                                                    | Prospective                                                                                                                                                                                    |                                                                                                                                                                                                                                                                                   |
| <b>Level of implementation of the NGS analyses</b> | Proof-of-concept                                                                                                                                                                               |                                                                                                                                                                                                                                                                                   |
|                                                    | Used for a specific public health problem                                                                                                                                                      |                                                                                                                                                                                                                                                                                   |
|                                                    | Implemented into routine public health practices: nation-wide prospective genotyping (surveillance)/routine tool during outbreak investigation                                                 |                                                                                                                                                                                                                                                                                   |
| <b>Key findings</b>                                |                                                                                                                                                                                                | Reported key findings concerning the use of pathogen genomics for public health practice in terms of its added value and challenges.                                                                                                                                              |
