# Supplementary material for: Status and potential of bacterial genomics for public health practice: a scoping review
Source: Springer Nature journal article supplement (doi:10.1186/s13012-019-0930-2), 2019-08-13
Supplement: MOESM5 [file 17064080]

| Domain                     | Search terms                                                                                                                                                                                                                                                             |
|----------------------------|--------------------------------------------------------------------------------------------------------------------------------------------------------------------------------------------------------------------------------------------------------------------------|
| Bacterial infections       | ("Bacterial Infections"[Mesh] OR "Microbiology"[Mesh] OR "Genome, Bacterial"[MeSH] OR "Foodborne Diseases"[Mesh] OR "foodborne"[TIAB] OR "microbiology"[TIAB] OR "bacteria*"[TIAB])<br>AND                                                                               |
| Next generation sequencing | "High-Throughput Nucleotide Sequencing"[Mesh] OR "Metagenomics"[Mesh] OR "Genotyping Techniques/methods"[MAJR] OR "whole genome sequencing"[TIAB] OR "next generation sequencing"[TIAB] OR "NGS"[TIAB] OR "WGS"[TIAB] OR "genomics"[TIAB] OR "metagenomics"[TIAB]<br>AND |
| Public health              | "Public Health Practice"[Mesh] OR "Disease Outbreaks"[Mesh] OR "Epidemiologic Methods"[Mesh] OR "surveillance"[TIAB] OR "outbreak*"[TIAB] OR "epidemiology"[TIAB] OR "monitor*" [TIAB]                                                                                   |

**PubMed search string used on 24/03/2018 and on 04/09/2019 (for the updated search)**

("Bacterial Infections"[Mesh] OR "Microbiology"[Mesh] OR "Genome, Bacterial"[MeSH] OR "Foodborne Diseases"[Mesh] OR "foodborne"[TIAB] OR "microbiology"[TIAB] OR "bacteria\*"[TIAB]) AND ("High-Throughput Nucleotide Sequencing"[Mesh] OR "Metagenomics"[Mesh] OR "Genotyping Techniques/methods"[MAJR] OR "whole genome sequencing"[TIAB] OR "next generation sequencing"[TIAB] OR "NGS"[TIAB] OR "WGS"[TIAB] OR "genomics"[TIAB] OR "metagenomics"[TIAB]) AND ("Public Health Practice"[Mesh] OR "Disease Outbreaks"[Mesh] OR "Epidemiologic Methods"[Mesh] OR "surveillance"[TIAB] OR "outbreak\*"[TIAB] OR "epidemiology"[TIAB] OR "monitor\*" [TIAB])
