# Supplementary material for: Status and potential of bacterial genomics for public health practice: a scoping review
Source: Implement Sci. 2019 Aug 13;14:79. doi: 10.1186/s13012-019-0930-2 (PMC6692930; doi:10.1186/s13012-019-0930-2)
Supplement: Supplementary file 3 — Inclusion and exclusion criteria organized according to the Population-Concept-Context (PCC) principle, as outlined in the Joanna Briggs’ Manual for Scoping Reviews. (PDF 499 kb) [file 13012_2019_930_MOESM3_ESM.pdf]

| Inclusion                                                                                                                                                                                                                                                                                                                                                                                                                                                                                                                  | Exclusion                                                                                                                                                                                                                                                                                                                                                                                                                                                                                                                                                                                                                                                                                      |
|----------------------------------------------------------------------------------------------------------------------------------------------------------------------------------------------------------------------------------------------------------------------------------------------------------------------------------------------------------------------------------------------------------------------------------------------------------------------------------------------------------------------------|------------------------------------------------------------------------------------------------------------------------------------------------------------------------------------------------------------------------------------------------------------------------------------------------------------------------------------------------------------------------------------------------------------------------------------------------------------------------------------------------------------------------------------------------------------------------------------------------------------------------------------------------------------------------------------------------|
| Language: English full text<br>Timeframe: studies published between 1/1/2015 and 4/9/2018<br>All geographical regions<br>Studies with primary NGS data available or describing the implementation of NGS                                                                                                                                                                                                                                                                                                                   | No English full text available<br>Studies published before 1/1/2015<br>/<br>Conference abstracts or literature reviews                                                                                                                                                                                                                                                                                                                                                                                                                                                                                                                                                                         |
| <i>Population</i>                                                                                                                                                                                                                                                                                                                                                                                                                                                                                                          |                                                                                                                                                                                                                                                                                                                                                                                                                                                                                                                                                                                                                                                                                                |
| Studies must include at least two individuals with a bacterial infection.                                                                                                                                                                                                                                                                                                                                                                                                                                                  | Non-human studies, i.e. studies only including environmental or animal samples.                                                                                                                                                                                                                                                                                                                                                                                                                                                                                                                                                                                                                |
| <i>Concept</i>                                                                                                                                                                                                                                                                                                                                                                                                                                                                                                             |                                                                                                                                                                                                                                                                                                                                                                                                                                                                                                                                                                                                                                                                                                |
| Studies must apply NGS on the bacterial isolates (pathogen genomics), more specifically studies with a strong focus on the use of NGS (as a primary typing tool or being a determining factor for the outcome of the study)                                                                                                                                                                                                                                                                                                | No use of NGS (e.g. microarray studies).<br>Use of NGS for a small, insignificant subset of samples, i.e. studies where NGS does not play a major role and/or where there is not focus on the use/application/added value/challenges of NGS.<br>Not applying NGS on bacterial isolates (e.g. studies only sequencing host genomes, studies only sequencing pathogens other than bacteria).                                                                                                                                                                                                                                                                                                     |
| <i>Context</i>                                                                                                                                                                                                                                                                                                                                                                                                                                                                                                             |                                                                                                                                                                                                                                                                                                                                                                                                                                                                                                                                                                                                                                                                                                |
| To be considered genomic epidemiology, study aims should include at least one of the following:<br>- Outbreak investigation (source tracing, interrupt transmission, feedback on key phenotypic attributes)<br>- Control-oriented surveillance (early outbreak detection, identify the emergence of new threats, understand transmission dynamics)<br>- Strategy-oriented surveillance (overview of circulating strains, understand transmission dynamics, evaluation of control programs, identification of risk factors) | Studies that do not focus on outbreak investigations or surveillance and control (i.e. not for public health practice), for example:<br>- Studies only focusing on technical aspects of the sequence technologies (e.g. benchmarking of sequencing methods, comparison of sequencing methods, description of sequencing methods, etc.)<br>- Studies only/mainly focusing on bioinformatics aspects (e.g. developing new typing schemes)<br>- Studies using NGS for research purposes (e.g. underlying biological mechanisms, cellular processes, evolutionary aspects, etc.)<br>- Studies using NGS to identify biological markers that can be used for future routine public health practices |
| Studies must describe the application of NGS at the population level (i.e. from a public health perspective)                                                                                                                                                                                                                                                                                                                                                                                                               | Studies not focusing on the population perspective:<br>- Studies using NGS solely for individual patient care (e.g. diagnostic studies - studies examining whole genome sequencing for prediction of phenotypic drug resistance or studies that exclusively test new diagnostic approaches without meeting the above inclusion criteria)<br>- Studies including less than two clinical samples from patients, apart from environmental or animal samples.<br>- Studies describing individual patients/cases (i.e. case studies)                                                                                                                                                                |
| Studies using NGS within a real-life public health setting producing an output that can be directly translated into actionable results for public health (including proof-of-concept studies).                                                                                                                                                                                                                                                                                                                             | Studies using NGS in an experimental setting (e.g. using a small convenience sample of historic isolates, only suggesting the use of NGS in a routine public health setting but not yet applying it, etc.)                                                                                                                                                                                                                                                                                                                                                                                                                                                                                     |
